# Supplementary material
Source: PubMed Central journal article supplement (PMC4116070)
Supplement: ASN.2013101125_ASN2013101125SupplementaryData.pdf [file ASN.2013101125_ASN2013101125SupplementaryData.pdf]

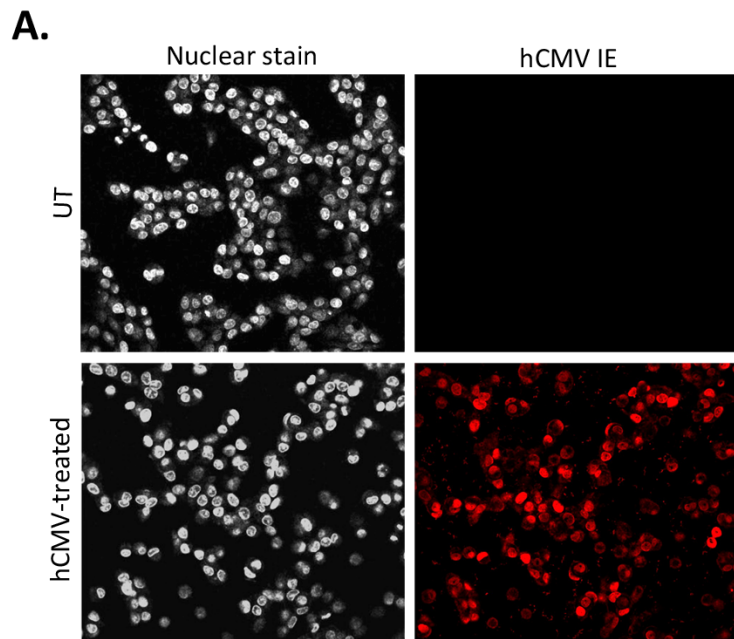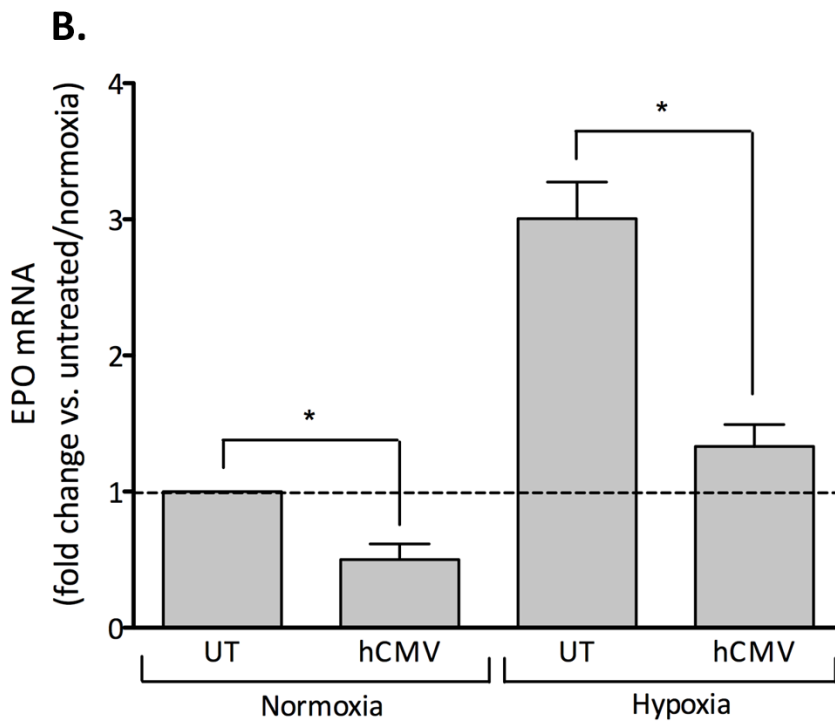

**Supplementary Figure 1. hCMV inhibits EPO mRNA production in HepG2 cells.** HepG2 were mock infected or treated with hCMV at a MOI of 5 and cultured for 24h. Immunocytochemistry was used to confirm expression of hCMV immediate early protein (**A**) or EPO mRNA expression following an additional 18-20h exposure to 1% O<sub>2</sub> or maintenance at normoxia for 18-20h was quantified (plotted relative to the untreated control under normoxic conditions) (**B**). Data are mean ± SEM from 3 independent experiments. \*p < 0.05

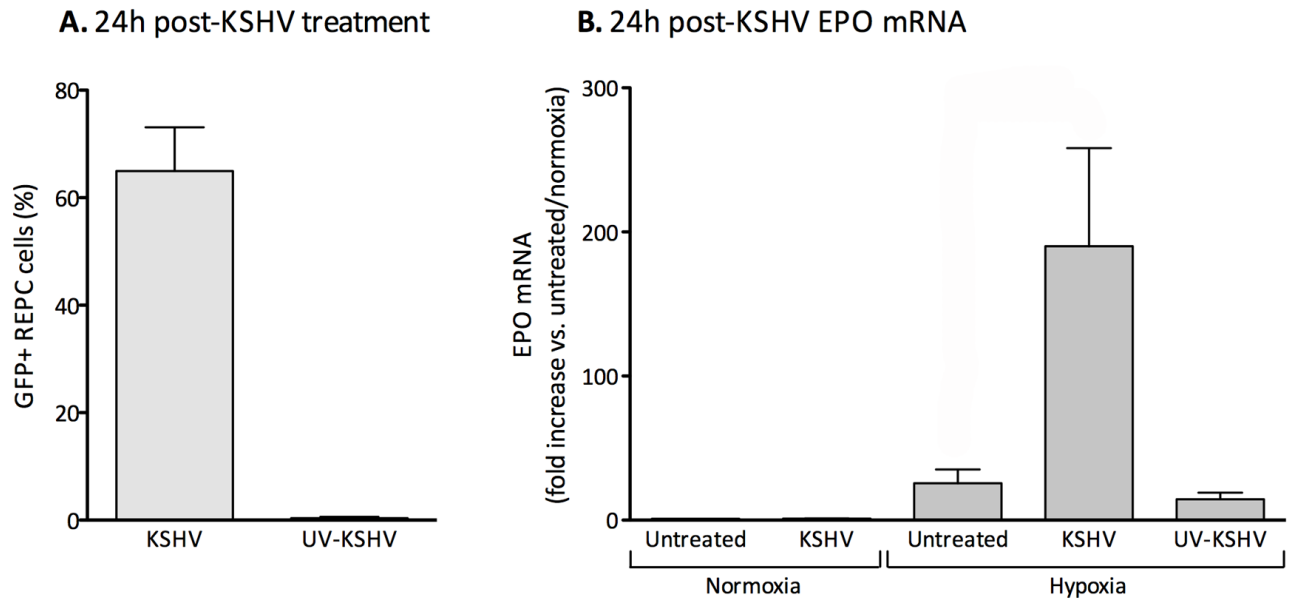

**Supplementary Figure 2. rKSHV.219 does not inhibit HEPC EPO mRNA under conditions of hypoxia.** Cells were treated with rKSHV.219, or UV-inactivated rKSHV.219, at a MOI of 1 and cultured for 24h prior to measurement of the % of cells expressing GFP **(A)**, or the expression of EPO mRNA following exposure to 1% O<sub>2</sub> for 18-20h (plotted relative to the untreated control under normoxic conditions) **(B)**. Data are mean ± SEM from 3 independent experiments.

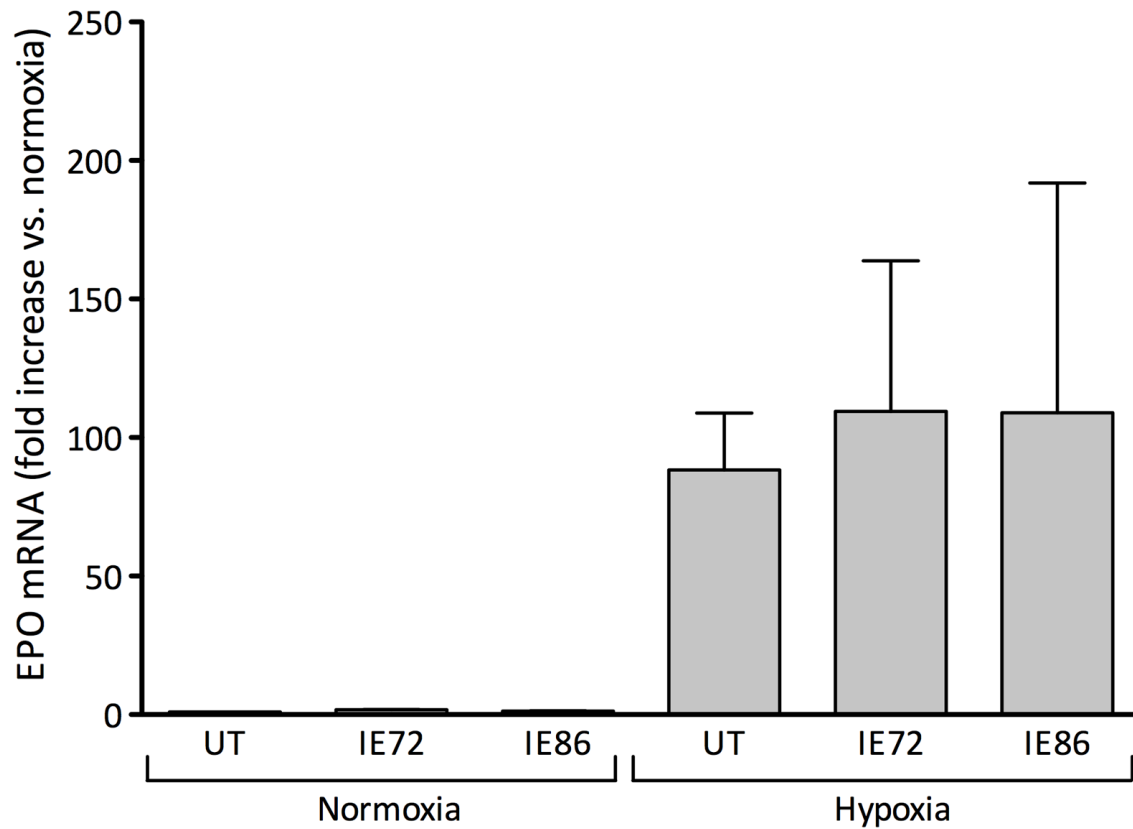

**Supplementary Figure 3. Overexpression of hCMV IE 72 or IE86 does not inhibit HEPC EPO production under conditions of hypoxia.** Cells were treated with overexpression vectors for hCMV IE72 or IE86 and cultured for 24h prior to exposure to 1% O<sub>2</sub> or maintenance at normoxia for 18-20h, before analysis of EPO mRNA production. Data are mean  $\pm$  SEM from 3-4 independent experiments.

**Supplementary Table 1.** Patient Characteristics

| <b>Patient characteristics</b>                             | <b>Patients with stage 4 renal failure (n = 13)</b> |
|------------------------------------------------------------|-----------------------------------------------------|
| Mean age (years, $\pm$ SD)                                 | 61 $\pm$ 15                                         |
| Gender [n (%)]                                             |                                                     |
| Male                                                       | 9 (69.0)                                            |
| Female                                                     | 4 (31.0)                                            |
| Cause of renal insufficiency [n (%)]                       |                                                     |
| Vasculitis                                                 | 3 (23.0)                                            |
| Lupus nephritis                                            | 3 (23.0)                                            |
| Membranous glomerulonephritis                              | 2 (15.0)                                            |
| Diabetes                                                   | 1 (8.0)                                             |
| Biochemical parameters                                     |                                                     |
| CMV IgG (IU, $\pm$ SD)                                     | 0.35 $\pm$ 0.2                                      |
| EPO (U/mL, $\pm$ SD)                                       | 6.3 $\pm$ 3.5                                       |
| White blood cell count (10 <sup>9</sup> cells/L, $\pm$ SD) | 7.3 $\pm$ 2.4                                       |
| Neutrophils (10 <sup>9</sup> cells/L, $\pm$ SD)            | 4.4 $\pm$ 1.7                                       |
| Lymphocytes (10 <sup>9</sup> cells/L, $\pm$ SD)            | 2.0 $\pm$ 1.0                                       |
| Monocytes (10 <sup>9</sup> cells/L, $\pm$ SD)              | 0.7 $\pm$ 0.2                                       |
| Hematocrit (% , $\pm$ SD)                                  | 37.4 $\pm$ 6.3                                      |
| Red blood cells (x10 <sup>12</sup> /L, $\pm$ SD)           | 4.0 $\pm$ 0.8                                       |
| Hemoglobin (g/dL, $\pm$ SD)                                | 12.5 $\pm$ 2.5                                      |
| MCV (fL, $\pm$ SD)                                         | 93.2 $\pm$ 5.4                                      |
| MCH (pg, $\pm$ SD)                                         | 31.1 $\pm$ 1.4                                      |
| RDW (% , $\pm$ SD)                                         | 14.2 $\pm$ 1.1                                      |
| Platelets (x10 <sup>3</sup> / $\mu$ L, $\pm$ SD)           | 188.1 $\pm$ 73.8                                    |

MCV, mean corpuscular volume; MCH, mean corpuscular hemoglobin concentration; RDW, red blood cell distribution width

**Supplementary Table 2.** Hematological characteristics of mice with systemic mCMV infection.

| Variable                                       | Non-infected<br>(n=7) | 1 week after<br>infection (n=10) | 6 weeks after<br>infection (n=8) | <i>P</i> |
|------------------------------------------------|-----------------------|----------------------------------|----------------------------------|----------|
| WBC ( $10^3/\mu\text{l}$ )                     | 2.42 ± 1.02           | 2.43 ± 1.84                      | 1.49 ± 0.68                      | 0.29     |
| Hemoglobin (g/dL)                              | 13.77 ± 0.63          | 13.46 ± 1.24                     | 13.58 ± 1.26                     | 0.85     |
| Hematocrit (%)                                 | 41.59 ± 1.86          | 42.77 ± 2.91                     | 42.31 ± 3.29                     | 0.70     |
| RBC ( $10^6/\text{L}$ )                        | 8.99 ± 0.40           | 9.33 ± 0.84                      | 9.53 ± 1.04                      | 0.47     |
| Corpuscular volume (fL)                        | 46.24 ± 0.61          | 45.96 ± 1.42                     | 44.96 ± 1.18                     | 0.10     |
| Corpuscular hemoglobin (pg)                    | 15.31 ± 0.07          | 14.42 ± 0.20                     | 14.41 ± 0.19                     | <0.0001  |
| Corpuscular hemoglobin<br>concentration (g/dL) | 33.1 ± 0.38           | 31.43 ± 0.95                     | 32.05 ± 0.67                     | 0.0007   |
| RDW-SD (fL)                                    | 30.97 ± 0.67          | 32.16 ± 1.22                     | 33.19 ± 1.30                     | 0.004    |
| Red blood cell distribution<br>width (%)       | 22.04 ± 0.55          | 22.55 ± 0.66                     | 23.5 ± 1.44                      | 0.02     |
| Platelet count ( $10^3/\mu\text{l}$ )          | 721.29 ± 78.00        | 983.30 ± 180.63                  | 659.13 ± 134.25                  | 0.0002   |
| Platelet distribution width (fL)               | 7.94 ± 0.87           | 6.81 ± 0.21                      | 6.98 ± 0.34                      | 0.0004   |
| Platelet volume (fL)                           | 6.73 ± 0.30           | 6.21 ± 0.17                      | 6.25 ± 0.28                      | 0.0007   |
| Platelet large cell ratio (%)                  | 6.19 ± 2.19           | 3.33 ± 1.05                      | 3.51 ± 1.65                      | 0.0034   |
| Plateletcrit (%)                               | 0.61 ± 0.13           | 0.41 ± 0.07                      | 0.48 ± 0.05                      | 0.0006   |

Values are mean ± SD.

WBC, white blood cell count; RBC, red blood cell count, RWD, red cell distribution width
